# Supplementary material for: Effect of a monitored home-based exercise program combined with a behavior change intervention and a smartphone app on walking distances and quality of life in adults with peripheral arterial disease: the WalkingPad randomized clinical trial
Source: PubMed Central journal article supplement (PMC10702743; doi:10.3389/fcvm.2023.1272897), 2023-11-22

## GUIA DE INSTALAÇÃO DA APLICAÇÃO WALKINGPAD

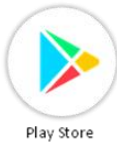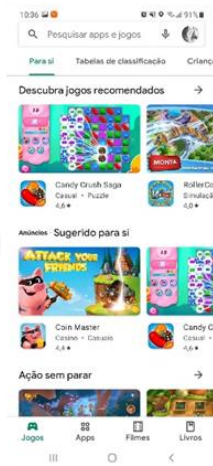

1. Abrir a aplicação 'Play Store'

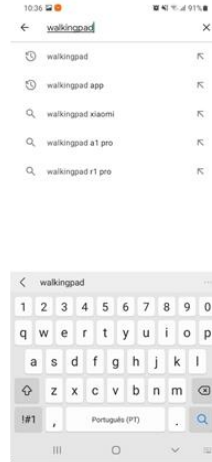

2. Pesquisar "Walkingpad"

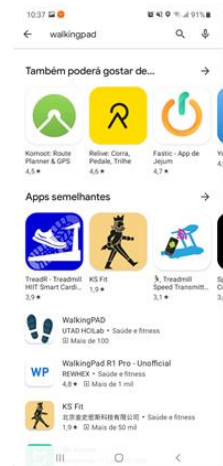

3. Carregar na aplicação 'WalkingPAD' (imagem dos pés)

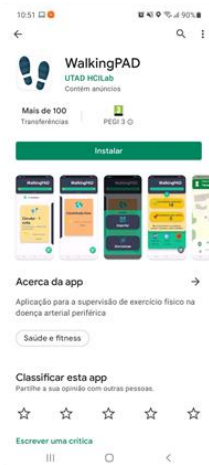

4. Carregar em "Instalar"

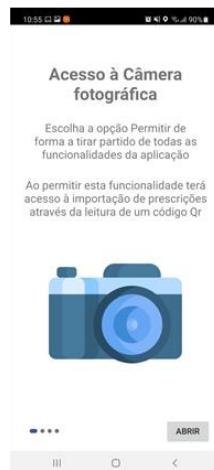

5. Abrir a aplicação WalkingPAD e carregar em "Abrir"> "Permitir"> "Seguinte" (repetir as vezes necessárias)

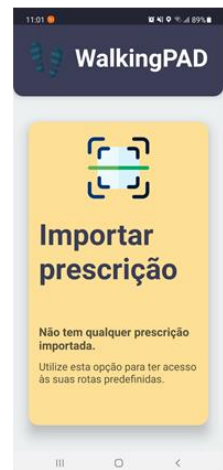

6. Carregar em "Importar prescrição" e apontar a câmara para o QRCode abaixo

## QR code - Walking PAD

Processo: 307

Token: undefined

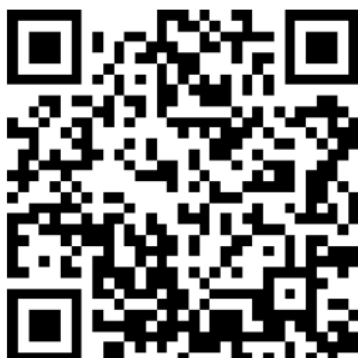

7. App está pronta a usar!

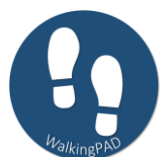

Supplement: Datasheet3.pdf [file Datasheet3.pdf]
